# Supplementary material for: Discriminant Analysis of Brazilian Stingless Bee Honey Reveals an Iron-Based Biogeographical Origin
Source: MDPI journal article supplement (doi:10.3390/foods12010180), 2023-01-01
Supplement: s1 [file s1]

## *Supplementary*

# **Discriminant analysis of Brazilian stingless bee honey reveals an iron-based biogeographical origin**

**Flavia C. Lavin<sup>1</sup>, Brendo A. Gomes<sup>2</sup>, Marcos V. T. Silva<sup>1</sup>, Renata M. Nunes<sup>1</sup>, Suzana G. Leitão<sup>3</sup>, Mirian R. L. Moura<sup>3</sup>, Rosineide C. Simas<sup>4,5</sup>, Carla S. Carneiro<sup>3,\*</sup> and Igor A. Rodrigues<sup>3,\*</sup>**

<sup>1</sup> Programa de Pós-graduação em Ciências Farmacêuticas, Faculdade de Farmácia, Universidade Federal do Rio de Janeiro, Rio de Janeiro, 21941-902, Brazil

<sup>2</sup> Programa de Pós-graduação em Biotecnologia Vegetal, Universidade Federal do Rio de Janeiro, Rio de Janeiro, 21941-902, Brazil

<sup>3</sup> Laboratório de Cromatografia e Espectrometria de Massas (LaCEM), Universidade Federal de Goiás, Goiânia, 74.690-900, Brazil

<sup>4</sup> Escola Presbiteriana Mackenzie, Escola de Engenharia, Instituto Mackenzie, Higienópolis, São Paulo, 01302-907, Brazil;

<sup>5</sup> Departamento de Produtos Naturais e Alimentos, Faculdade de Farmácia, Universidade Federal do Rio de Janeiro, Rio de Janeiro, 21941-902, Brazil

\* Correspondence: CSC, carlacarneiro@pharma.ufrj.br; IAR, igor@pharma.ufrj.br

**Table S1.** Correlation matrix between physicochemical and antioxidant activity of samples of stingless bee honey from different geographical regions of Brazil.

|       | Aw            | TSS           | Mois          | BP           | pH            | FA           | TA     | HMF    | Color        | TPC          | TFC    | FRAP  | ABTS |
|-------|---------------|---------------|---------------|--------------|---------------|--------------|--------|--------|--------------|--------------|--------|-------|------|
| Aw    | 1             |               |               |              |               |              |        |        |              |              |        |       |      |
| TSS   | <b>-0.864</b> | 1             |               |              |               |              |        |        |              |              |        |       |      |
| Mois  | <b>0.903</b>  | <b>-0.963</b> | 1             |              |               |              |        |        |              |              |        |       |      |
| BP    | 0.291         | <b>-0.361</b> | <b>0.330</b>  | 1            |               |              |        |        |              |              |        |       |      |
| pH    | 0.115         | -0.220        | 0.134         | 0,003        | 1             |              |        |        |              |              |        |       |      |
| FA    | 0.209         | -0.153        | 0.205         | <b>0.534</b> | <b>-0.709</b> | 1            |        |        |              |              |        |       |      |
| TA    | -0.177        | <b>0.407</b>  | <b>-0.344</b> | <b>0.538</b> | -0.429        | <b>0.810</b> | 1      |        |              |              |        |       |      |
| HMF   | -0.344        | -0.163        | 0.129         | 0.417        | 0.485         | -0.311       | -0.174 | 1      |              |              |        |       |      |
| Color | -0.511        | -0.145        | 0.184         | <b>0.514</b> | -0.208        | 0.159        | -0.295 | 0.417  | 1            |              |        |       |      |
| TPC   | -0.202        | 0.099         | -0.061        | 0.132        | -0.032        | 0.303        | -0.083 | 0.385  | <b>0.637</b> | 1            |        |       |      |
| TFC   | 0.005         | -0.031        | 0.078         | <b>0.401</b> | -0.305        | <b>0.532</b> | -0.076 | 0.209  | <b>0.866</b> | <b>0.705</b> | 1      |       |      |
| FRAP  | <b>0.422</b>  | -0.312        | 0.359         | -0.114       | <b>0.636</b>  | -0.289       | 0.227  | -0.300 | -0.323       | 0.194        | -0.226 | 1     |      |
| ABTS  | 0.194         | -0.072        | 0.064         | 0.336        | <b>0.559</b>  | -0.342       | 0.009  | -0.264 | -0.002       | -0.126       | -0.072 | 0.299 | 1    |

The bold numbers indicate a statistically significant correlation ( $p < 0.05$ ).

**Table S2.** Results of the standard reference material 1577b.

| Elements | Calculated<br>Concentration<br>( $\mu\text{g/g}$ )* | Certified<br>Value ( $\mu\text{g/g}$ ) | Relative<br>error (%) |
|----------|-----------------------------------------------------|----------------------------------------|-----------------------|
| P        | 1010.2 $\pm$ 36.9                                   | 1100                                   | 8                     |
| S        | 874.2 $\pm$ 28.2                                    | 785                                    | 11                    |
| Cl       | 304.6 $\pm$ 15.8                                    | 278                                    | 9                     |
| Ca       | 103.8 $\pm$ 11.1                                    | 116                                    | 10                    |
| Mn       | 11.1 $\pm$ 2.4                                      | 10.5                                   | 5                     |
| Fe       | 209.8 $\pm$ 4.3                                     | 184                                    | 14                    |
| Cu       | 139.6 $\pm$ 3.3                                     | 160                                    | 13                    |
| Zn       | 115.0 $\pm$ 3.0                                     | 127                                    | 9                     |
| Rb       | 13.9 $\pm$ 2.3                                      | 13.7                                   | 1                     |

\*Mean  $\pm$  standard deviation (n=13).

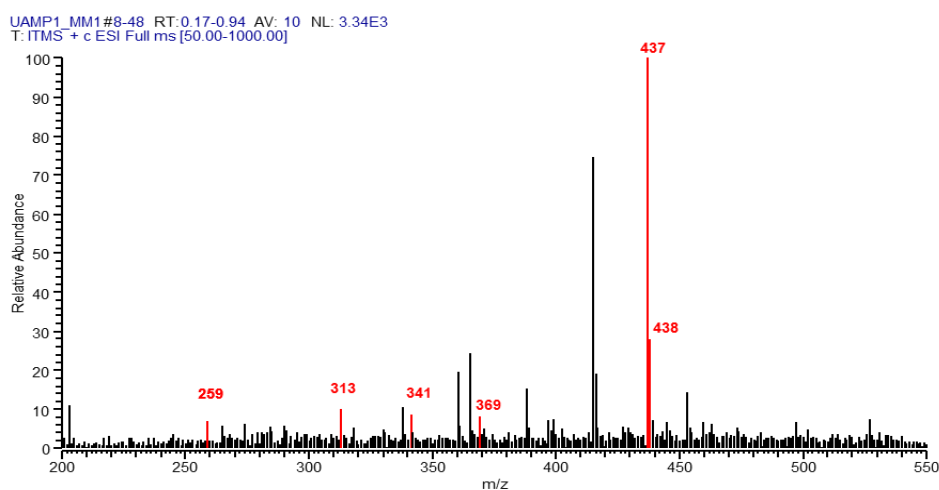

(a)

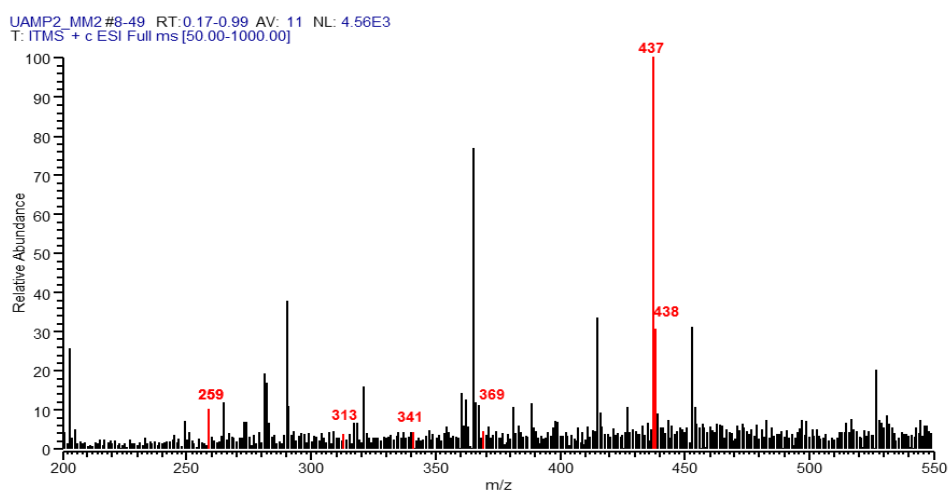

(b)

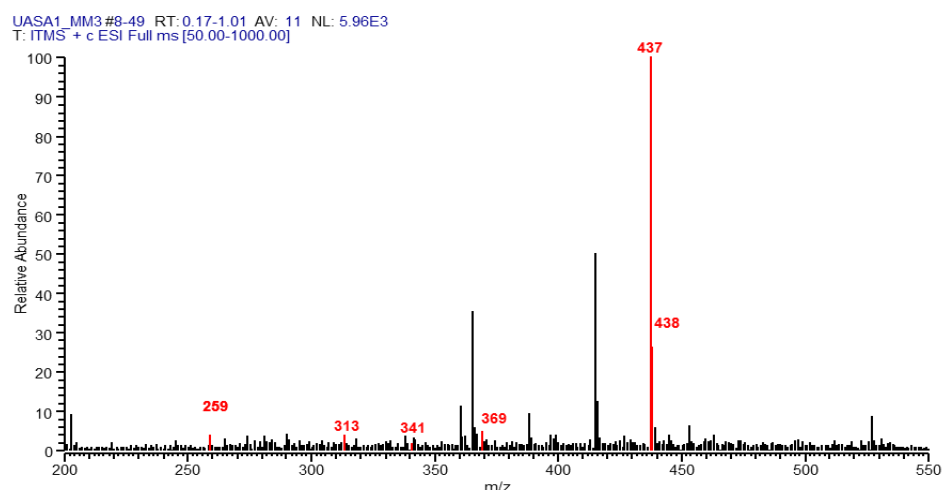

(c)

**Figure S1.** Mass spectra of stingless bee honey collected in the Atlantic Forest biogeographical zone. (a) MM1; (b) MM2; (c) MM3. Ion masses responsible for samples' separation into groups (VIP score > 2) are highlighted in red.

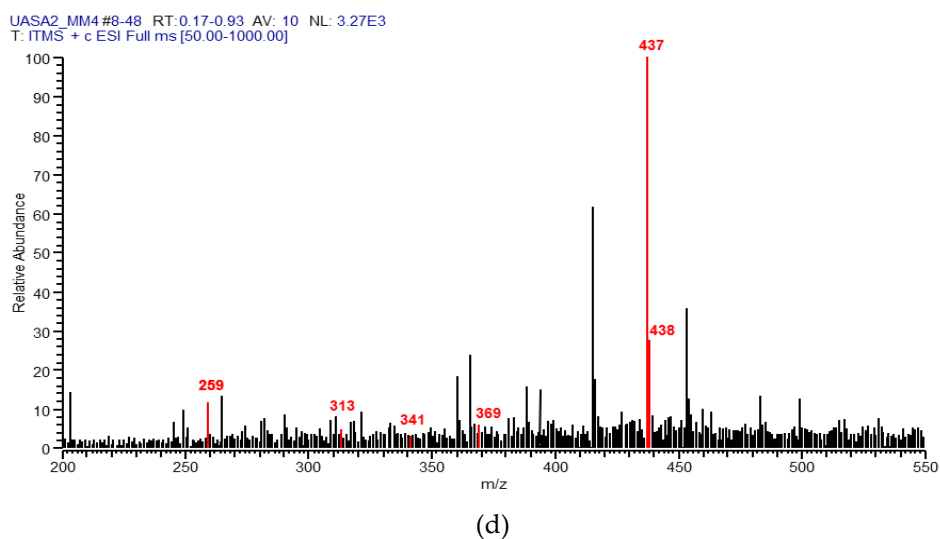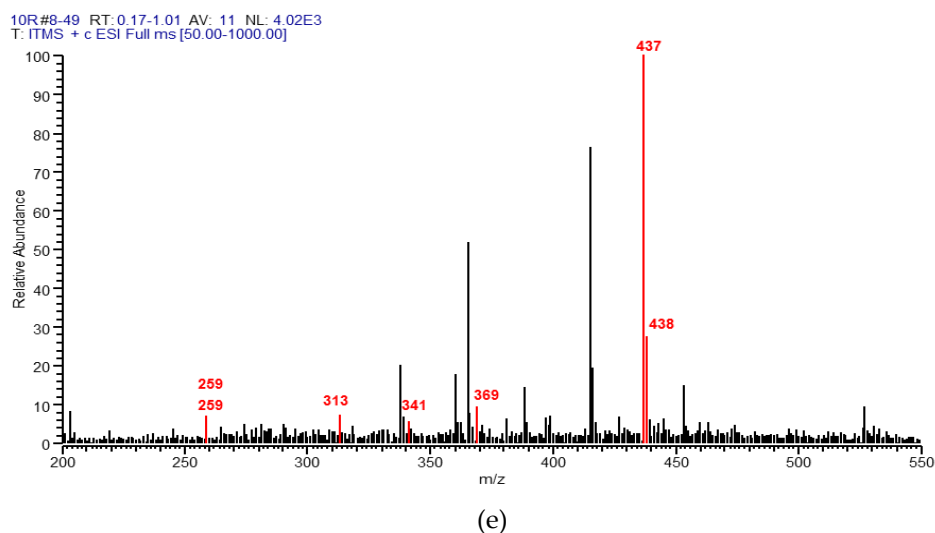

**Continuation of Figure S1.** Mass spectra of stingless bee honey collected in the Atlantic Forest biogeographical zone. (d) MM4; (e) MQ1. Ion masses responsible for samples' separation into groups (VIP score > 2) are highlighted in red.

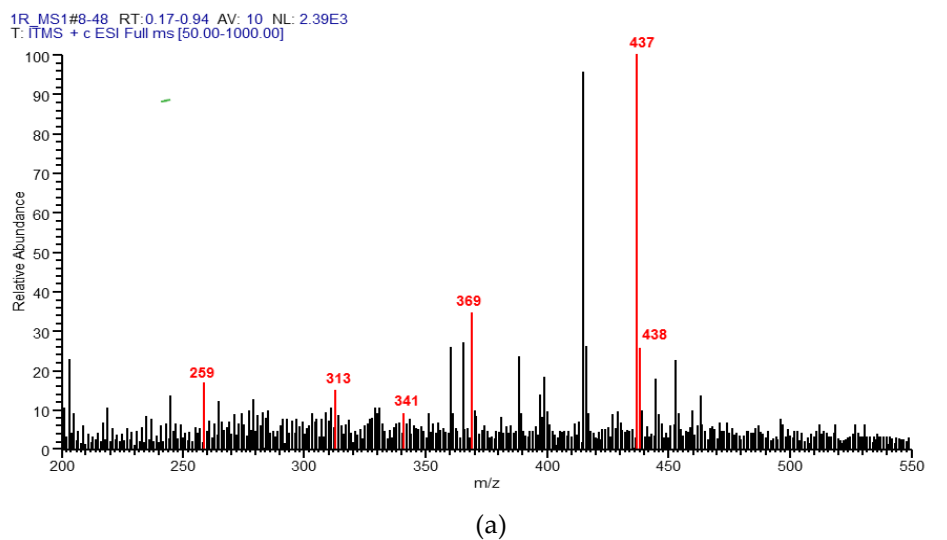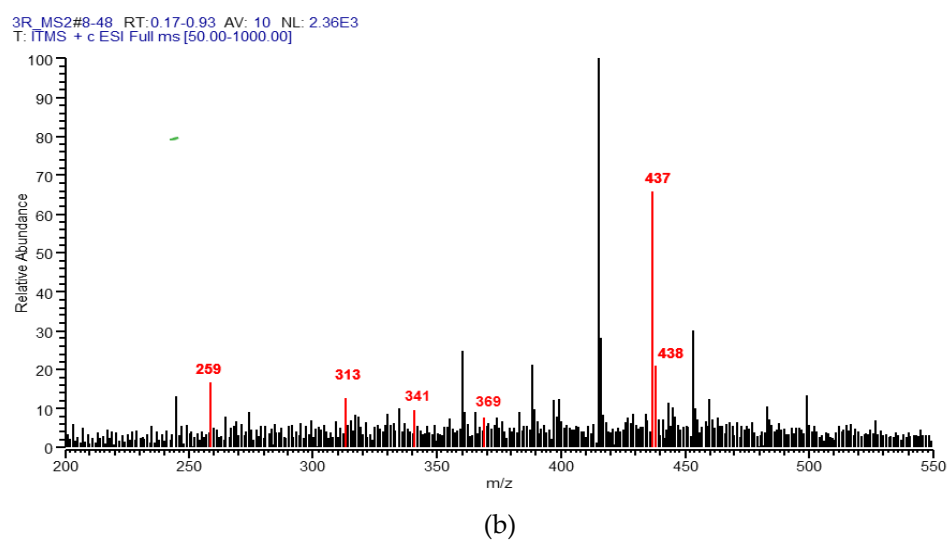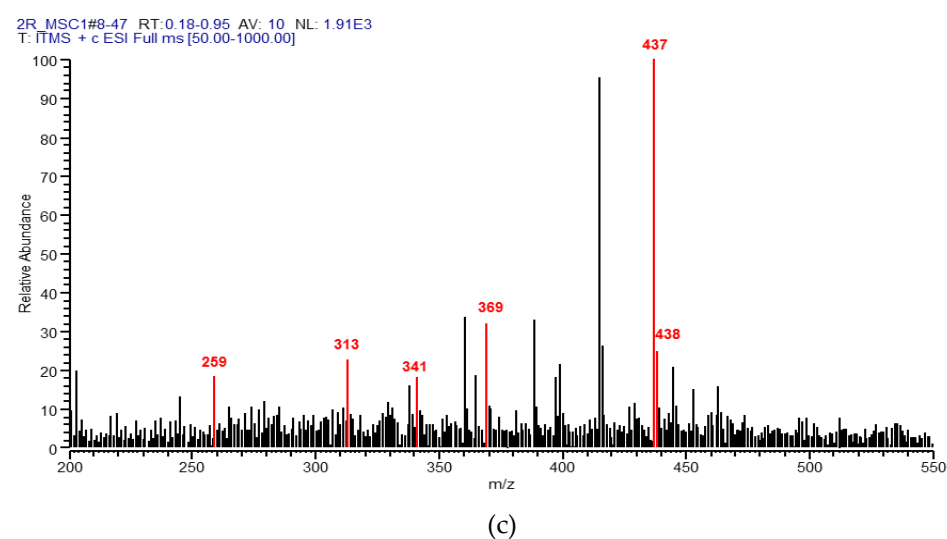

**Figure S2.** Mass spectra of stingless bee honey collected in the *Caatinga* biogeographical zone. (a) MS1; (b) MS2; (c) MSC1. Ion masses responsible for samples' separation into groups (VIP score > 2) are highlighted in red.

13R\_MSC2#8-50 RT:0.17-0.98 AV: 11 NL: 6.07E3  
T: ITMS + c ESI Full ms [50.00-1000.00]

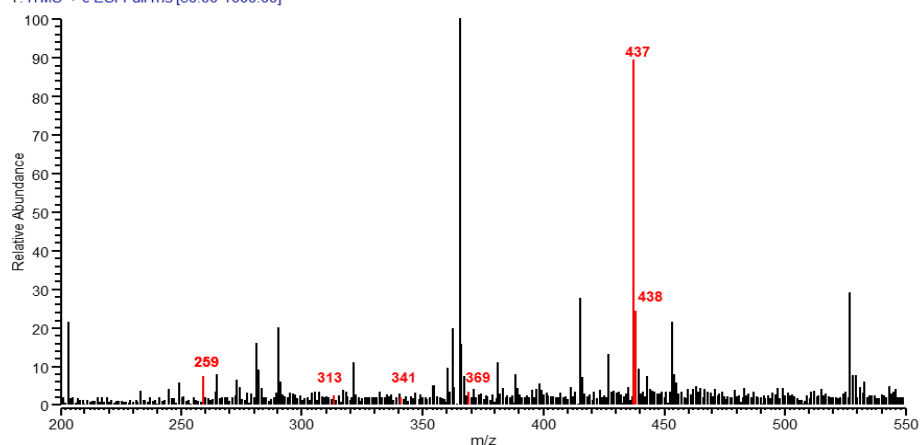

(d)

15R\_MSC3#8-49 RT:0.18-1.00 AV: 11 NL: 4.25E3  
T: ITMS + c ESI Full ms [50.00-1000.00]

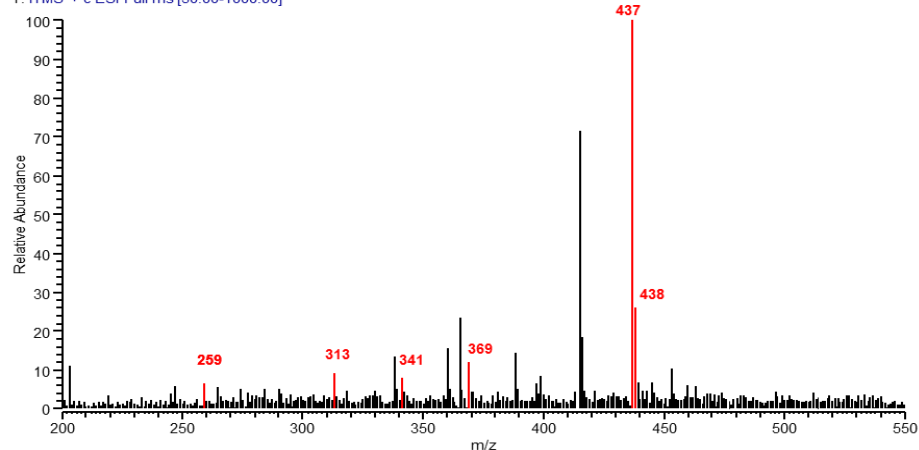

(e)

12R\_MM5#8-48 RT:0.18-0.93 AV: 10 NL: 2.86E3  
T: ITMS + c ESI Full ms [50.00-1000.00]

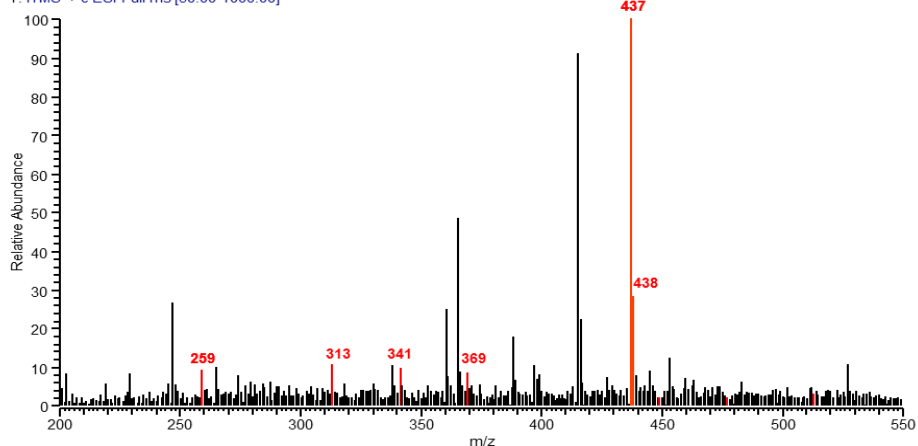

(f)

**Continuation of Figure S2.** Mass spectra of stingless bee honey collected in the Caatinga biogeographical zone. (d) MSC2; (e) MSC3; (f) MM5. Ion masses responsible for samples' separation into groups (VIP score > 2) are highlighted in red.

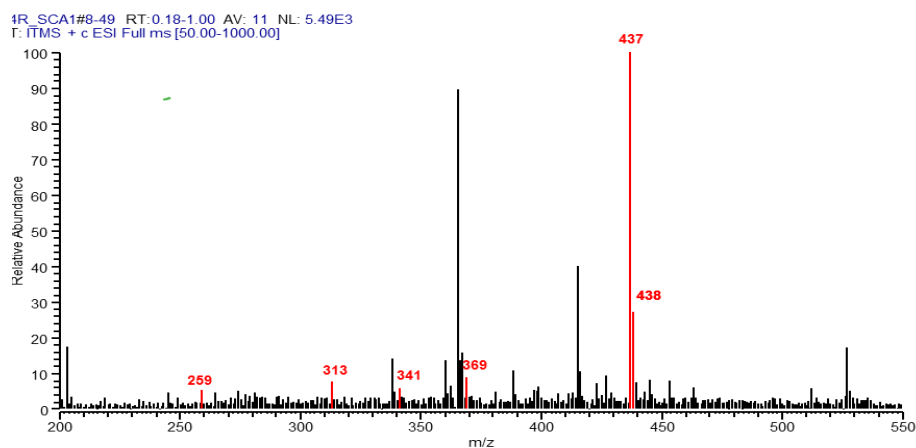

(g)

**Continuation of Figure S2.** Mass spectra of stingless bee honey collected in the *Caatinga* biogeographical zone. (g) SCA1. Ion masses responsible for samples' separation into groups (VIP score > 2) are highlighted in red

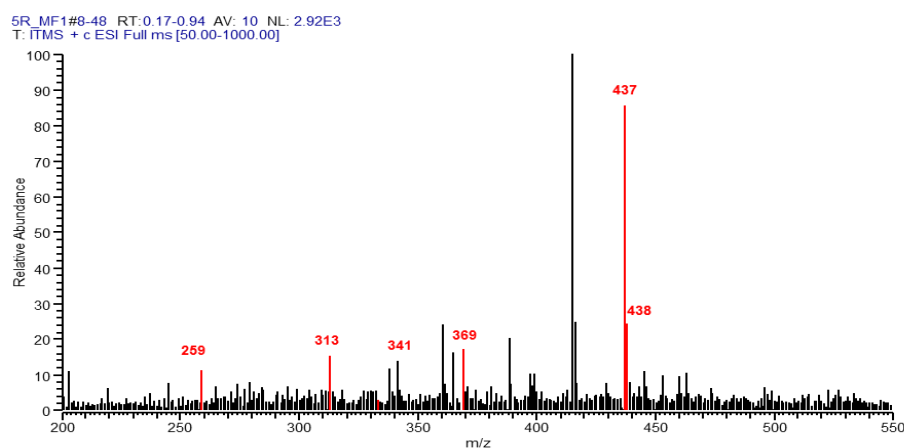

(a)

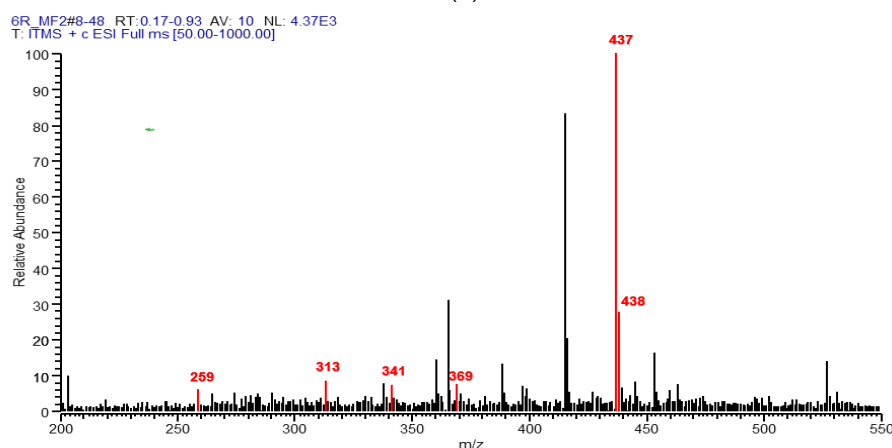

(b)

**Figure S3.** Mass spectra of stingless bee honey collected in the *Cerrado* biogeographical zone. (a) MF1; (b) MF2. Ion masses responsible for samples' separation into groups (VIP score > 2) are highlighted in red.



7R\_MF3#8-48 RT: 0.17-0.94 AV: 10 NL: 3.11E3  
T: [TMS + c ESI Full ms [50.00-1000.00]]

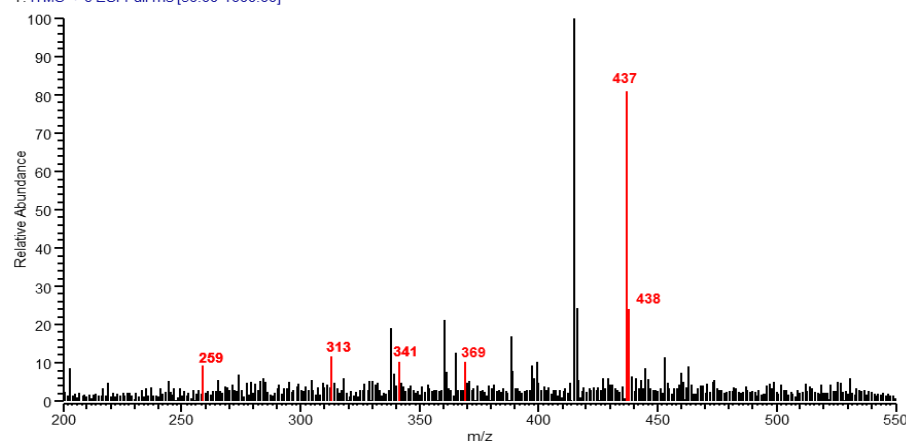

(c)

8R\_MF4#8-47 RT: 0.17-0.94 AV: 10 NL: 4.48E3  
T: [TMS + c ESI Full ms [50.00-1000.00]]

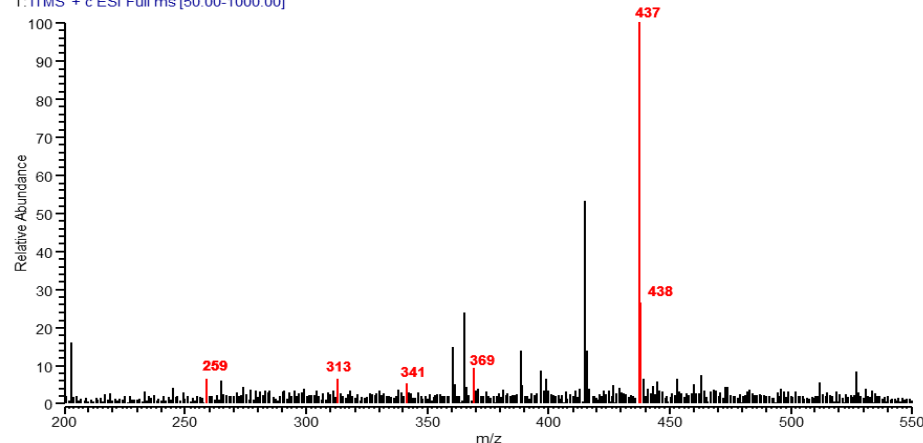

(d)

9R\_SCP1#8-49 RT: 0.17-0.99 AV: 11 NL: 5.10E3  
T: [TMS + c ESI Full ms [50.00-1000.00]]

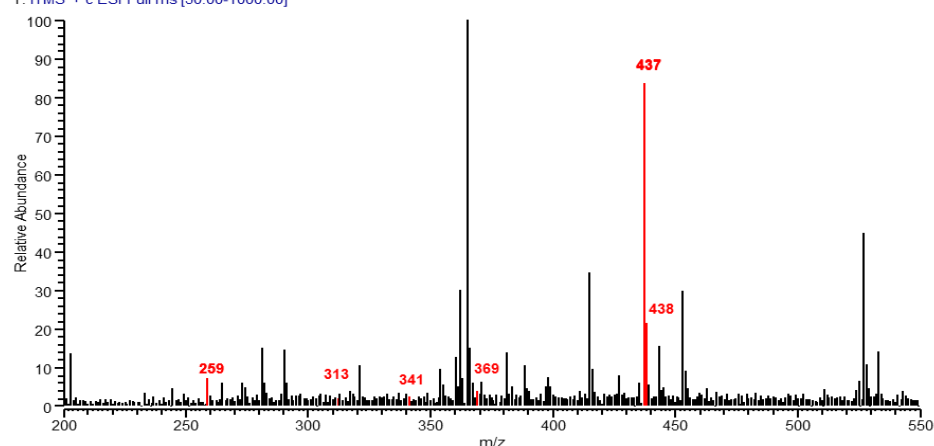

(e)

**Continuation of Figure S3.** Mass spectra of stingless bee honey collected in the *Caatinga* biogeographical zone. (c) MF3; (d) MF4; (e) SCP1. Ion masses responsible for samples' separation into groups (VIP score > 2) are highlighted in red.

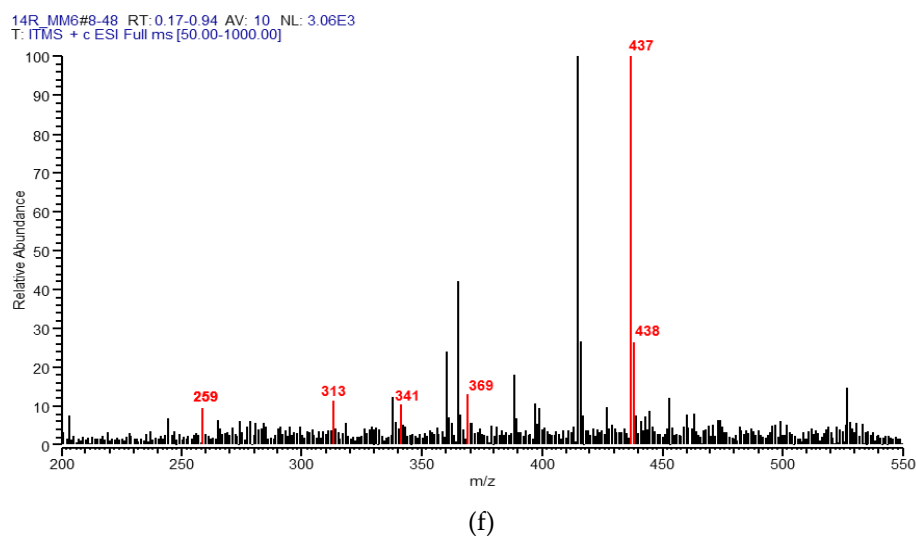

**Continuation of Figure S3.** Mass spectra of stingless bee honey collected in the *Caatinga* biogeographical zone. (f) MM6. Ion masses responsible for samples' separation into groups (VIP score > 2) are highlighted in red.

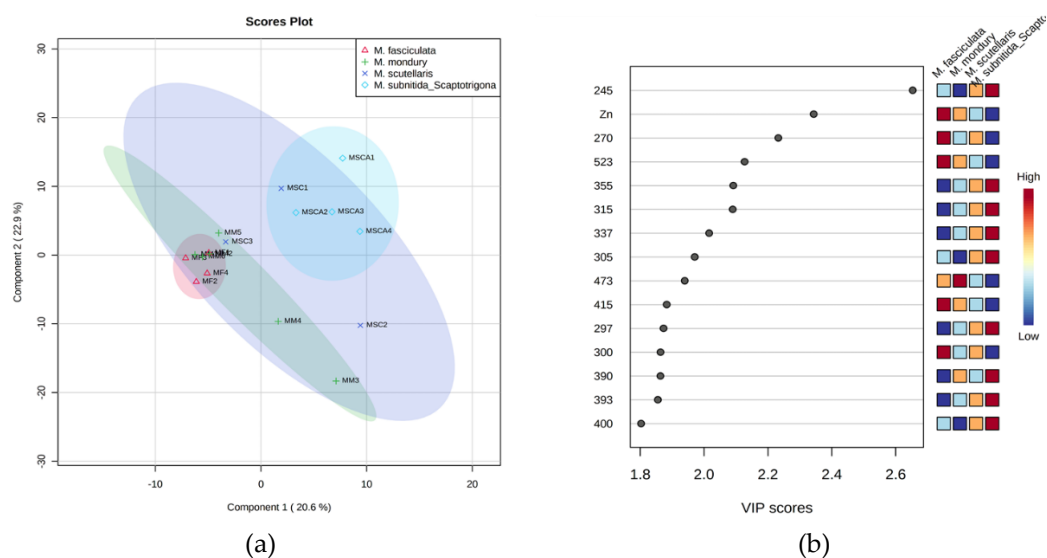

**Figure S4.** Discriminant analysis of SBH based on bee species. PLS-DA score plots (a) and VIP score (b) of physicochemical parameters, mineral profile, antioxidant capacity, and mass fingerprint analysis of stingless bee honey.
